# Supplementary material
Source: PubMed Central journal article supplement (PMC4403165)
Supplement: pnas.201423201SI.pdf [file pnas.201423201SI.pdf]

# Supporting Information

Hammarén et al. 10.1073/pnas.1423201112

## SI Materials and Methods

**Cell Culture and Transfection.** JAK2-deficient  $\gamma$ 2A fibrosarcoma cells and COS7 cells were cultured in DMEM supplemented with 10% (vol/vol) FBS (Life Technologies), 4 mM L-Glutamine, and 1% PenStrep (Sigma) at 37 °C in 5% (vol/vol) CO<sub>2</sub>. Cells were transfected at 60% confluency using FuGENE6 (Promega) or Xtreme-GENE9 (Roche) according to the manufacturers' instructions using 300 ng of plasmid DNA per six-well plate. Amount of DNA was varied for each construct to obtain similar expression levels. After 10 h cells were starved in serum-free DMEM overnight. Stimulation was done for 30 min with human EPO (NeoRecormon, Roche) at 200 U/mL or with hIFN $\gamma$  (Peprotech) at 0.5  $\mu$ g/mL.

**Immunoblotting.** Cells were lysed by scraping into Triton-X cell lysis buffer (50 mM Tris•Cl pH 7.5, 10% (vol/vol) glycerol, 150 mM NaCl, 1 mM EDTA, 1% Triton X-100, 50 mM NaF). Lysates were centrifuged and the supernatant was used directly for SDS/PAGE and immunoblotting. Blots were blocked using 1% BSA (Sigma) and double-stained with phosphospecific antibodies [pJAK2(Y1007–Y1008) at 1:2,000 (Cell Signaling, cat. no. 3771), pSTAT1(Y701) 1:1,000 (Cell Signaling, cat. no. 9171), pSTAT5A(Y694) 1:1,000 (Cell Signaling, cat. no. 9351), pJAK1(Y1022–Y1023) 1:1,000 (Millipore, cat. no. 07–849), and HA 1:2,000 (Covance, cat. no. MMS-101P)]. Secondary antibody incubation was done in a mix of IRDye-labeled anti-rabbit 1:5,000 (LI-COR, cat. no. 926–68021) and anti-mouse 1:10,000 (Thermo Scientific, cat. no. 35521), after which signals were detected and quantified using a LI-COR Odyssey CLx. A minimum of three independent experiments were performed for each condition.

**Plasmid Constructs.** For mammalian cell culture and recombinant plasmid production, mutations were introduced by QuikChange site-directed mutagenesis (Agilent Technologies) into full-length human JAK2-HA in pCIneo and pFastBac1 JAK2(513–827-6xHis for wild type or V617F) or JAK2(536–812-6xHis, W659A, W777A, and F794H for “wild type,” or W659A, W777A, and V617F for “V617F”) pFastBac1 plasmids (1), respectively. Human EPOR-HA and STAT5A-HA used for mammalian cell culture were in pCIneo and pXM eukaryotic expression vectors, respectively. For in vivo bone marrow transplant experiments, human JAK2 mutants were generated using QuikChange site-directed mutagenesis in pMSCV-IRES GFP plasmids. pMSCV-IRES GFP JAK2 and pMSCV-IRES GFP JAK2 V617F were used as templates. pMSCV-IRES GFP plasmid integrity was

checked by Hind III cleavage. All mutations in all plasmids were verified by sequencing.

**Retroviral Transduction and Bone Marrow Transplantation.** Total bone marrow cells from 5-FU-treated (single i.p. injection, 150 mg/kg, 7 d before harvesting) C57BL/6 donor mice (Harlan Laboratories) were transduced and transplanted into C57BL/6 female recipients lethally irradiated with 12 Gy (2). Mice were kept under specified pathogen-free conditions with free access to food and water. Blood was collected into EDTA-coated microtainers (BD Biosciences) by tail vein sampling 12 wk posttransplantation. Complete blood counts were determined on the ADVIA120 hematology analyzer using the Multispecies software (Bayer).

**Statistical Analysis of in Vivo Results.** Results are presented as means  $\pm$  SEM. To assess statistical significance among individual cohorts, one-way ANOVA with subsequent Bonferroni posttest was conducted (Graph Pad Prism, vs. 4.00, 2003), and *P* values less than 0.05 were considered significant.

**Fluorometric TSA.** Thermal-shift experiments were carried out in 96-well PCR plates in a final volume of 25  $\mu$ L with the following reagent concentrations: 8x Sypro Orange (Molecular Probes, cat. no. S6551), 5.5  $\mu$ M protein Ni-NTA eluate, 20 mM MgCl<sub>2</sub>, 20 mM Tris•Cl (pH 8.0), 500 mM NaCl, 20% (vol/vol) glycerol, and differing ATP concentrations. Reactions were heated in a real-time CFX96 PCR cyclor (Bio-Rad) at 1 °C per min from 4 °C to 95 °C with a fluorescence read every 1 °C. Fluorescence data were then normalized to represent unfolding curves, which were fitted to a Boltzmann sigmoidal equation with GraphPad Prism to obtain *T<sub>m</sub>* values.

**MANT-ATP Binding Assay.** Binding of MANT-ATP (Jena Biosciences) to protein was measured with a Quantamaster spectrofluorometer (Photon Technology International) by measuring FRET between the protein and MANT at a final volume of 140–150  $\mu$ L. Reaction mixtures (20 mM Tris•HCl pH 8.0, 200 mM NaCl, 10% (vol/vol) glycerol, 2 mM DTT, 1.5  $\mu$ M or 2  $\mu$ M for recombinant JAK2 and JAK1 JH2 protein, respectively, with 10 mM of either MgCl<sub>2</sub>, MnCl<sub>2</sub>, CaCl<sub>2</sub>, or no cation at all) were excited at 280 nm and fluorescence measured as a 300–500-nm emission scan. MANT-ATP stocks were titrated in concentrated stocks (10  $\mu$ M, 100  $\mu$ M, and 1,000  $\mu$ M). Binding was measured from emitted fluorescence at 440–450 nm corrected for the primary inner filter effect. The *K<sub>d</sub>* value was calculated from at least triplicate measurements using GraphPad Prism essentially as described in ref. 3, taking into account protein dilution and ligand depletion.

1. Bandaranayake RM, et al. (2012) Crystal structures of the JAK2 pseudokinase domain and the pathogenic mutant V617F. *Nat Struct Mol Biol* 19(8):754–759.
2. Tiedt R, et al. (2008) Ratio of mutant JAK2-V617F to wild-type Jak2 determines the MPD phenotypes in transgenic mice. *Blood* 111(8):3931–3940.
3. Zeqiraj E, et al. (2009) ATP and MO25 $\alpha$  regulate the conformational state of the STRAD $\alpha$  pseudokinase and activation of the LKB1 tumour suppressor. *PLoS Biol* 7(6):e1000126.

4. Heinig M, Frishman D (2004) STRIDE: A web server for secondary structure assignment from known atomic coordinates of proteins. *Nucleic Acids Res* 32(Web Server issue):W500–W502.
